# Supplementary material for: Climate change drove Late Miocene to Pliocene rise and fall of C 4 vegetation at the crossroads of Africa and Eurasia (Anatolia, Türkiye)
Source: Copernicus journal article supplement (doi:10.5194/cp-2024-80), 2025-01-14
Supplement: Supplementary file 1 [file cp-2024-80-supplement.zip]

## Sheet: Data Leaf & Pollen
Table S2: Anatolian climate reconstructions derived from paleobotanic data
Paleobotanic data-derived climate reconstructions from (compilations in) Kayseri-Özer (2017) and Kayseri-Özer & Emre (2022) using the coexistence approach (Mosbrugger & Utescher, 1997).
Location Name	Reference	Longitude (deg)	Latitude (deg)	Region	Original Time Slice	Age Remarks	Age Max (Ma)	Age Min (Ma)	Age (Ma)	Age Uncertainty (Ma)	Taxa	Assemblage Type	min_MAT	av_MAT	max_MAT	unc_MAT	min_CMT	av_CMT	max_CMT	unc_CMT	min_WMT	av_WMT	max_WMT	unc_WMT	MART	min_MAP	av_MAP	max_MAP
Karacasu-Dandalas	1.2	37.7	28.6	Coastal	late Pliocene-earliest Pleistocene		3.6	1.8	2.7	0.9	10	Pollen	13.8	19.55	25.3	5.75	3.1	11.55	20	8.45	20.6	24.6	28.6	4	13.05	740	1349	1958
Karacasu- Karacaören	1.2	37.8	28.7	Coastal	late Pliocene-earliest Pleistocene		3.6	1.8	2.7	0.9	11	Pollen	11.6	16.5	21.4	4.9	-0.3	6.8	13.9	7.1	19.6	24.1	28.6	4.5	17.3	450	1013.5	1577
Bingol-Halifan	3.4	40	39.2	Plateau	middle - late Pliocene		4.6	2.58	3.59	1.01	21	Pollen	13.3	15.85	18.4	2.55	1.7	7.1	12.5	5.4	23.6	25.95	28.3	2.35	18.85	897	1237	1577
Erzurum-Horosan	4.5	42.3	40	Plateau	middle - late Pliocene		4.6	2.58	3.59	1.01	10	Pollen	13.3	17.3	21.3	4	-0.1	8.1	16.3	8.2	19.6	24.1	28.6	4.5	16	897	1255	1613
Kirikkale-Baliseyh	6	34	39.7	Plateau	early Pliocene		5.333	3.6	4.4665	0.8665	27	Pollen	12.9	13.45	14	0.55	0.9	2.3	3.7	1.4	23.6	23.95	24.3	0.35	21.65	1300	1368.5	1437
Nevsehir-Guzeloz	6.7	34.9	38.4	Plateau	early Pliocene		5	4	4.4665	0.5	13	Pollen	10	15.55	21.1	5.55	-6.5	4.9	16.3	11.4	21.7	25	28.3	3.3	20.1	735	1045	1355
Kahramanmaras-Elbistan	6.8	37.2	38.2	Plateau	early Pliocene		5.333	3.6	4.4665	0.8665	21	Pollen	16.5	16.85	17.2	0.35	0.1	0.6	1.1	0.5	27.3	27.5	27.7	0.2	26.9	887	1203.5	1520
Afyon-Akcakoy	6.9	30.3	38.1	Plateau	early Pliocene		5.333	5	5.1665	0.1665	29	Pollen	15.6	16.1	16.6	0.5	-0.3	0.4	1.1	0.7	21.7	24.75	27.8	3.05	24.35	1300	1327.5	1355
Kirikkale-Baliseyh	6	34	39.7	Plateau	late late Miocene		7.246	5.333	6.2895	0.9565	26	Pollen	17	17.3	17.6	0.3	6.2	7.95	9.7	1.75	23.6	24.85	26.1	1.25	16.9	803	1062.5	1322
Iskenderun-Kizlargozu	4,10	36.1	36.2	Coastal	late Miocene		11.63	5.333	8.4815	3.1485	25	Pollen	17.2	19.55	21.9	2.35	10	12.8	15.6	2.8	23.6	25.75	27.9	2.15	12.95	803	867.5	932
Iskenderun-Haciahmetli	4,10	36.1	36.3	Coastal	late Miocene		11.63	5.333	8.4815	3.1485	21	Pollen	15.7	19.8	23.9	4.1	9.6	13.3	17	3.7	23.6	25.75	27.9	2.15	12.45	803	867.5	932
Sivas-Hafik	4,8,11	37.3	39.9	Plateau	early late Miocene	Middle Tortonian (in (19)), ca. 8-6 Ma and possibly younger (see (20))	8	6	7	1	18	Pollen	16.5	18.65	20.8	2.15	5.5	10.55	15.6	5.05	27.3	27.7	28.1	0.4	17.15	887	1203.5	1520
Elazig	4,8,12	39	38.7	Plateau	early late Miocene	early Tortonian (in (19))	11.63	7.246	9.438	2.192	12	Pollen	15.6	18.45	21.3	2.85	5	9.15	13.3	4.15	24.7	26.4	28.1	1.7	17.25	823	1198.5	1574
Cankiri (Tuglu Formation)	4,13	33.5	40.9	Plateau	late Miocene	late Tortonian (in (12))	11.2	8.2	9.7	1.5	N.A.	Pollen	13.8	15.4	17	1.6										823	877.5	932
Aydin-Kizilcayer	2,14	27.7	38	Coastal	late early - early middle Miocene		12.63	10.63	11.63	1	10	Pollen	13.8	17.55	21.3	3.75	3.1	8.2	13.3	5.1	20.7	24.65	28.6	3.95	16.45	740	1176.5	1613
Aydin-Haskoy Upper Coal Mine	4,12,15	28	38.1	Coastal	latest middle - earliest late Miocene	latest Serravallian - earliest Tortonian (in (19))	12.63	10.63	11.63	1	28	Pollen	9.4	10.1	10.8	0.7	0.9	1	1.1	0.1	25.4	26.8	28.1	1.3	25.8	1183	1351.5	1520
Aydin-Kosk Upper Coal Mine	2,12,15	27.9	38	Coastal	latest middle - earliest late Miocene	Serravalian-Tortonian boundary (in (2))	12.63	10.63	11.63	1		Pollen		13.58				2.33				22.6			20.27		1194
Aydin-Saraykoy-Sazak	4,12,15	28.8	37.7	Coastal	latest middle - earliest late Miocene	latest Serravallian - earliest Tortonian (in (19))	12.63	10.63	11.63	1		Pollen	9.4	10.1	10.8	0.7	-0.1	0.5	1.1	0.6	21.7	24.9	28.1	3.2	24.4	1122	1321	1520
Sivas-Gemerek-Vasitepe	4,8,12,16	34.9	38.8	Plateau	latest middle - earliest late Miocene	latest Serravallian - earliest Tortonian (in (19))	12.63	10.63	11.63	1	24	Pollen	17.2	19	20.8	1.8	5.5	9.4	13.3	3.9	27.3	27.7	28.1	0.4	18.3	1187	1380.5	1574
Kirsehir-Tuzkoy	17,18	34.3	38.9	Plateau	late middle - early late Miocene	latest Serravallian - earliest Tortonian (in (19))	12.63	10.63	11.63	1	16	Pollen	13.5	17.15	20.8	3.65	1.8	7.55	13.3	5.75	25.4	26.75	28.1	1.35	19.2	1183	1269	1355
Mugla-Yatagan-Sekkoy	4,18	27.9	37.3	Coastal	late middle Miocene	latest Serravallian - earliest Tortonian (in (19)), early - middle Serravallian (in (12))	12.63	10.63	11.63	1	30	Pollen	17	19.15	21.3	2.15	6.2	9.75	13.3	3.55	26.5	27.4	28.3	0.9	17.65	1146	1234	1322
LocationName	location name as given in the sources
Longitude, Latitude	longitudinal and latitudinal coordinates in decimal form
Region	classification of different regions in Turkey: "Plateau" is the interior of modern Turkey, "Coastal" refers to coastal, low elevation locations
Original Time Slice	text descriptions of the age for the data point from Kayseri-Özer (2017) and Kayseri-Özer and Emre (2022)
Age Remarks	if given, adjusted ages and associated reference
Age Max	oldest possible age
Age Min	youngest possible age
Age	average of Age Min and Age Max
Age Uncertainty	Age Max minus Age or Age minus Age Min
Reference	sources for the data as given in Kayseri-Özer (2017) and Kayseri-Özer & Emre (2022)
min_MAT, av_MAT, max_MAT	mean annual temperature estimates (minimum, average, maximum) in °C
min_CMT, av_CMT, max_CMT	mean cold month temperature estimates (minimum, average, maximum) in °C
min_WMT, av_WMT, max_WMT	mean warm month temperature estimates (minimum, average, maximum) in °C
MART	mean annual range of temperature
min_MAP, av_MAP, max_MAP	mean annual precipitation estimates (minimum, average, maximum) in mm/yr
unc_	uncertainty

## Sheet: References
References
1.	H. Alçiçek, G. Jiménez-Moreno, Late Miocene to Plio-Pleistocene fluvio-lacustrine system in the Karacasu Basin (SW Anatolia, Turkey): Depositional, paleogeographic and paleoclimatic implications. Sediment Geol 291, 62–83 (2013).
2.	M. S. Kayseri-Özer, T. Emre, Palaeovegetation and paleoclimate in the SW Turkey – a study based on the early-middle Miocene coal-bearing sediments from the Büyük Menderes Graben. Rev Palaeobot Palynol 297 (2022).
3.	E. Nakoman, Ağaçlı Linyitlerinin Mikroflorasının Etüdü. Türkiye Jeoloji Bülteni 11, 51–57 (1968).
4.	M. S. Kayseri-Özer, Cenozoic vegetation and climate change in Anatolia — A study based on the IPR-vegetation analysis. Palaeogeogr Palaeoclimatol Palaeoecol 467, 37–68 (2017).
5.	C. Bozkuş, “Erzurum-Horasan-Ali çeyrek linyit sahasına ait jeolojik rapor M.T.A., Enerji Hammaddeleri D., Report Number: 308” (1978).
6.	M. S. Kayseri-Özer, et al., Palaeoclimatic and palaeoenvironmental interpretations of the Late Oligocene, Late Miocene–Early Pliocene in the Çankırı-Çorum Basin. Palaeogeogr Palaeoclimatol Palaeoecol 467, 16–36 (2017).
7.	N. Yavuz-Işık, V. Toprak, Palynostratigraphy and vegetation characteristics of Neogene continental deposits interbedded with the Cappadocia ignimbrites (Central Anatolia, Turkey). International Journal of Earth Sciences 99, 1887–1897 (2010).
8.	G. Saraç, “Türkiye Omurgalı Fosil Yatakları” (2003).
9.	N. Yavuz-Işık, G. Saraç, E. Ünay, H. De Bruijn, Palynological analysis of Neogene mammal sites of Turkey vegetational and climatic implications. Yerbilimleri 32, 105–120 (2011).
10.	V. S. Ediger, Z. Bati, H. Kozlu, Tortonian-Messinian Palynomorphs from the Easternmost Mediterranean Region around Iskenderun, Turkey. Micropaleontology 42, 189 (1996).
11.	F. Akgün, T. Kaya, A. Forsten, Z. Atalay, “Biostratigraphic data (Mammalia and Palynology) from the Upper Miocene İncesu Formation at Düzyayla (Hafik-Sivas, Central Anatolia)” (2000).
12.	M. S. Kayseri-Özer, Spatial distribution of climatic conditions from the Middle Eocene to Late Miocene based on palynoflora in Central, Eastern and Western Anatolia. Geodinamica Acta 26, 122–157 (2013).
13.	I. Mazzini, et al., Palaeoenvironmental and chronological constraints on the Tuğlu Formation (Çankırı Basin, Central Anatolia, Turkey). Turkish Journal of Earth Sciences (2013) https:/doi.org/10.3906/yer-1207-10.
14.	M. S. Kayseri-Özer, T. Emre, Palynology and palaeoclimate of the coal-bearing sed- iments in north Aydın-Köşk (Büyük Menderes Graben) in XII International Icnofabric Workshop, (2013), p. 7879.
15.	F. Akgün, E. Akyol, Palynostratigraphy ofthe coal-bearing Neogene deposits graben in Büyük Menderes Western Anatolia. Geobios 32, 367–383 (1999).
16.	M. S. Kayseri, F. Akgün, Palynostratigraphic, Palaeovegetational and Palaeoclimatic Investigations on the Miocene Deposits in Central Anatolia (Çorum Region and Sivas Basin). Turkish Journal of Earth Sciences 17, 361–403 (2008).
17.	M. S. Kayseri-Özer, H. Sözbilir, F. Akgün, Miocene palynoflora of the Kocaçay and Cumaovası basins: a contribution to the synthesis of Miocene palynology, palaeoclimate, and palaeovegetation in western Turkey. TURKISH JOURNAL OF EARTH SCIENCES 23, 233–259 (2014).
18.	M. S. Kayseri Özer, F. Akgün, S. Mayda, T. Kaya, Palynofloras and vertebrates from Muǧla-Ören region (SW Turkey) and palaeoclimate of the Middle Burdigalian-Langhian period in Turkey. Bull Geosci 89, 137–162 (2014).
19.	F. Akgün, M. S. Kayseri, M. S. Akkiraz, Palaeoclimatic evolution and vegetational changes during the Late Oligocene-Miocene period in Western and Central Anatolia (Turkey). Palaeogeogr Palaeoclimatol Palaeoecol 253, 56–58 (2007).
20.	M. J. M. Meijers, et al., Magnetostratigraphy of the Pikermian fauna-bearing late Miocene Sivas Basin (central Anatolia, Turkey): fluvio-lacustrine sedimentation under stable climatic conditions across the Tortonian-Messinian boundary. Newsl Stratigr 55, 285–310 (2022).
